# Supplementary material for: The effect of a mindfulness-based stress intervention on neurobiological and symptom measures in adolescents with early life stress: a randomized feasibility study
Source: PubMed Central journal article supplement (PMC8050904; doi:10.1186/s12906-021-03295-1), 2021-04-15
Supplement: 12906_2021_3295_MOESM1_ESM.pdf [file 12906_2021_3295_MOESM1_ESM.pdf]

Mindfulness for early life stress

**The effect of a mindfulness-based stress intervention on neurobiological and symptom measures in adolescents with early life stress: A randomized feasibility study**

Zsofia P. Cohen, BS<sup>1</sup>, Kelly T. Cosgrove, MA<sup>1,2</sup>, Elisabeth Akeman, MS<sup>1</sup>, Sara Coffey, DO<sup>3</sup>, Kent Teague, PhD<sup>3,4</sup>, Jennifer Hays-Grudo, PhD<sup>3</sup>, Martin P. Paulus, MD<sup>1</sup>, Robin L. Aupperle, PhD<sup>1,5</sup>, and Namik Kirlic, PhD<sup>1\*</sup>

<sup>1</sup>Laureate Institute for Brain Research, Tulsa, Oklahoma

<sup>2</sup>Department of Psychology, University of Tulsa, Tulsa, Oklahoma

<sup>3</sup>Center for Health Sciences, Oklahoma State University – Tulsa, Tulsa, Oklahoma

<sup>4</sup>Departments of Surgery and Psychiatry, University of Oklahoma School of Community Medicine, Tulsa, Oklahoma

<sup>5</sup>School of Community Medicine, University of Tulsa, Tulsa, Oklahoma

**\* Correspondence:**

Namik Kirlic, PhD

Associate Investigator

Laureate Institute for Brain Research

6655 South Yale Ave

Tulsa, OK 74136

Phone: 918-502-5747

Email: [nkirlic@laureateinstitute.org](mailto:nkirlic@laureateinstitute.org)

**Supplementary Tables**

Table S1. Schedule of events for self-report measures.

| Measure                    | SCRN | BASE | OA1 | OA2 | S1 | S2 | S3 | S4 | S5 | S6 | S7 | S8 | F/U |
|----------------------------|------|------|-----|-----|----|----|----|----|----|----|----|----|-----|
| ACEs                       | .    | .    |     |     |    |    |    |    |    |    |    |    | .   |
| AADIS                      |      | .    |     |     |    |    |    |    |    |    |    |    | .   |
| CD-RISC 10                 |      | .    |     |     |    |    |    |    |    |    |    |    | .   |
| CTQ                        |      | .    |     |     |    |    |    |    |    |    |    |    | .   |
| MAAS-A                     |      | .    | .   | .   |    |    |    |    |    |    |    |    | .   |
| MFQ                        |      | .    | .   | .   | .  | .  | .  | .  | .  | .  | .  | .  | .   |
| Homework Rating Scale      |      |      |     |     |    | .  | .  | .  | .  | .  | .  | .  |     |
| Working Alliance Inventory |      |      |     |     |    | .  | .  | .  | .  | .  | .  | .  |     |

Note. Time between pre-intervention assessments and the start of MBSR-T or CTRL took an average of 15.44 days [SD = 13.78]. MBSR-T or CTRL was delivered over an average of 27.52 days [SD = 3.31]. Time between completing intervention and post-intervention assessments took an average of 10.38 days [SD = 4.58].

Abbreviations: ACEs, Adverse Childhood Experiences scale; AADIS, Adolescent Alcohol and Drug Involvements Scale; B, Baseline; CD-RISC 10, Connor-Davidson Resilience Scale, 10 item; CTQ, Childhood Trauma Questionnaire; CTRL, Control; F/U, Follow-Up; MAAS-A, Mindful Attention Awareness Scale for Adolescents; OA, Online Assessment; S, Session; Scrn, Screening; MFQ, Mood and Feelings Questionnaire.

Mindfulness for early life stress

Table S2. Multiple regression analyses of baseline depression symptoms and biomarkers.

|                    | R <sup>2</sup> | B     | SE B | $\beta$ | p     |
|--------------------|----------------|-------|------|---------|-------|
| Cortisol           | 0.315          |       |      |         | 0.10  |
| CTQ                |                | -0.15 | 0.20 | -0.15   | 0.46  |
| Gender             |                | -0.13 | 0.43 | -0.06   | 0.77  |
| BMI                |                | -0.26 | 0.21 | -0.23   | 0.23  |
| Wakeup Time        |                | 0.10  | 0.15 | 0.15    | 0.48  |
| Time of Collection |                | -0.14 | 0.06 | -0.44   | <.05  |
| CRP                | 0.373          |       |      |         | <.005 |
| CTQ                |                | -0.23 | 0.24 | -0.23   | 0.13  |
| Gender             |                | -0.30 | 0.31 | -0.15   | 0.33  |
| BMI                |                | 0.68  | 0.16 | 0.64    | <.001 |
| IL-6               | 0.355          |       |      |         | <.005 |
| CTQ                |                | 0.03  | 0.19 | -0.09   | 0.90  |
| Gender             |                | -0.04 | 0.25 | -0.02   | 0.93  |
| BMI                |                | 0.55  | 0.13 | 0.65    | <.001 |
| Depression         | 0.02           |       |      |         | 0.25  |
| CTQ                |                | 0.25  | 0.18 | 0.26    | 0.12  |
| Gender             |                | -0.89 | 1.82 | -0.08   | 0.63  |
| FKBP5              | 0.003          |       |      |         | 0.39  |
| CTQ                |                | 0.25  | 0.29 | 0.24    | 0.91  |
| Gender             |                | -0.24 | 0.38 | -0.12   | 0.51  |
| BMI                |                | 0.18  | 0.19 | 0.18    | 0.29  |

Abbreviations: BMI, Body Mass Index; CTQ, Childhood Trauma Questionnaire; CRP, C-reactive protein; IL-6, interleukin-6.

## Mindfulness for early life stress

Table S3. Homework rating scale within the mindfulness-based stress reduction for teens group.

| Session | Mean  | SD    | Range        |
|---------|-------|-------|--------------|
| 1       | -     | -     | -            |
| 2       | 25.15 | 6.56  | 9.00 - 40.00 |
| 3       | 25.31 | 13.95 | 0.00 - 40.00 |
| 4       | 24.24 | 8.18  | 2.00 - 35.00 |
| 5       | 23.00 | 8.54  | 0.00 - 36.00 |
| 6       | 23.40 | 10.57 | 0.00 - 42.00 |
| 7       | 21.67 | 10.17 | 0.00 - 37.00 |
| 8       | 23.14 | 12.09 | 0.00 - 40.00 |

Note. Rated on a 5-point Likert scale (0 = not at all, 4 = completely), possible scores range from 0 to 48.

Mindfulness for early life stress

Table S4. Working Alliance Inventory within the mindfulness-based stress reduction for teens group.

| Session | Goals |      |               | Tasks |      |               | Bond  |      |               | Total |       |               |
|---------|-------|------|---------------|-------|------|---------------|-------|------|---------------|-------|-------|---------------|
|         | Mean  | SD   | Range         | Mean  | SD   | Range         | Mean  | SD   | Range         | Mean  | SD    | Range         |
| 1       | -     | -    | -             | -     | -    | -             | -     | -    | -             | -     | -     | -             |
| 2       | 14.41 | 2.94 | 10.00 - 20.00 | 14.24 | 2.61 | 9.00 - 20.00  | 14.71 | 3.14 | 10.00 - 20.00 | 43.35 | 7.42  | 32.00 - 60.00 |
| 3       | 15.00 | 4.10 | 4.00 - 20.00  | 14.40 | 4.02 | 6.00 - 20.00  | 15.50 | 4.59 | 4.00 - 20.00  | 44.90 | 12.01 | 14.00 - 60.00 |
| 4       | 14.41 | 4.51 | 4.00 - 20.00  | 14.35 | 3.37 | 8.00 - 20.00  | 15.53 | 3.52 | 11.00 - 20.00 | 44.29 | 10.15 | 28.00 - 60.00 |
| 5       | 14.67 | 3.79 | 7.00 - 20.00  | 13.67 | 2.66 | 10.00 - 20.00 | 15.00 | 3.27 | 12.00 - 20.00 | 43.33 | 8.84  | 31.00 - 60.00 |
| 6       | 15.36 | 4.78 | 4.00 - 20.00  | 15.36 | 3.61 | 9.00 - 20.00  | 16.21 | 3.83 | 10.00 - 20.00 | 46.93 | 10.95 | 31.00 - 60.00 |
| 7       | 15.08 | 3.96 | 8.00 - 20.00  | 15.75 | 3.47 | 9.00 - 20.00  | 16.25 | 3.93 | 8.00 - 20.00  | 47.08 | 9.85  | 27.00 - 60.00 |
| 8       | 14.79 | 4.79 | 8.00 - 20.00  | 15.79 | 3.83 | 8.00 - 20.00  | 15.14 | 4.64 | 8.00 - 20.00  | 45.71 | 12.42 | 24.00 - 60.00 |

Note. Rated on a 5-point Likert scale (1 = seldom, 5 = always), possible scores range from 4 to 20 for each subscale score and 12 to 60 for the total scale score.

Supplementary Figure

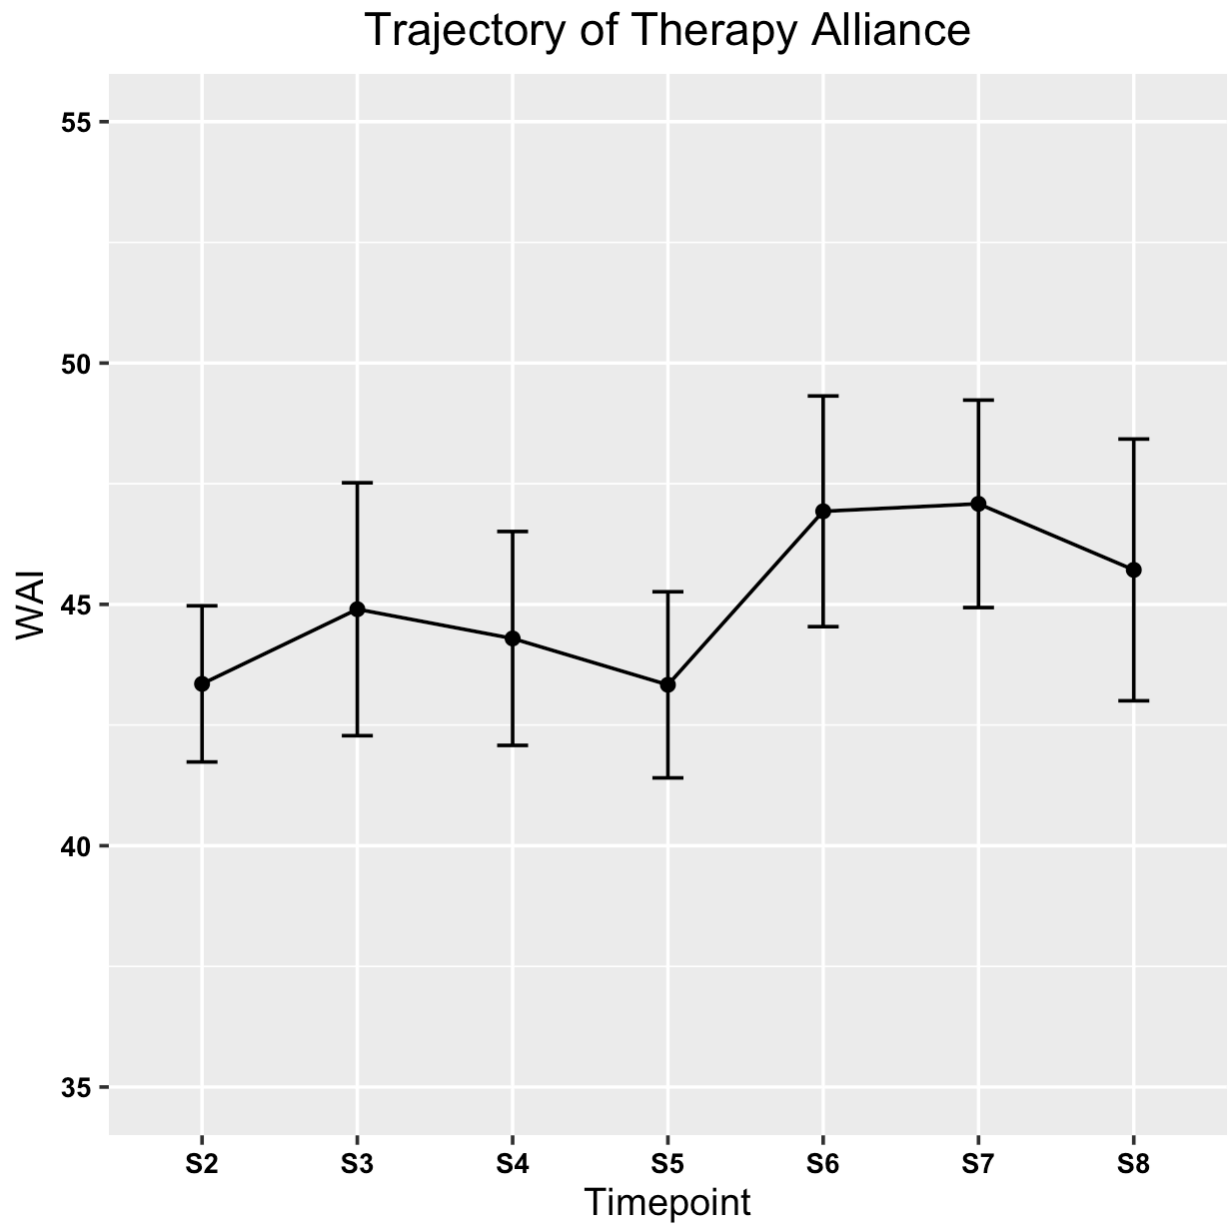

**Figure S1.** The trajectory of the total score of the Working Alliance Inventory. Therapeutic alliance evidenced minimal changes over the course of treatment among both the total scores and subscale scores.
